# Supplementary material for: Structural and electrophysiological basis for the modulation of KCNQ1 channel currents by ML277
Source: PubMed Central journal article supplement (PMC9243137; doi:10.1038/s41467-022-31526-7), 2022-06-29
Supplement: 41467_2022_31526_MOESM1_ESM.pdf [file 41467_2022_31526_MOESM1_ESM.pdf]

# **Structural and electrophysiological basis for the modulation of KCNQ1 channel currents by ML277**

Katrien Willegems, Jodene Eldstrom, Efthimios Kyriakis, Fariba Ataei, Harutyun Sahakyan, Ying Dou, Sophia Russo, Filip Van Petegem, and David Fedida

Supplementary Figures 1-10 and

Supplementary Tables 1-4

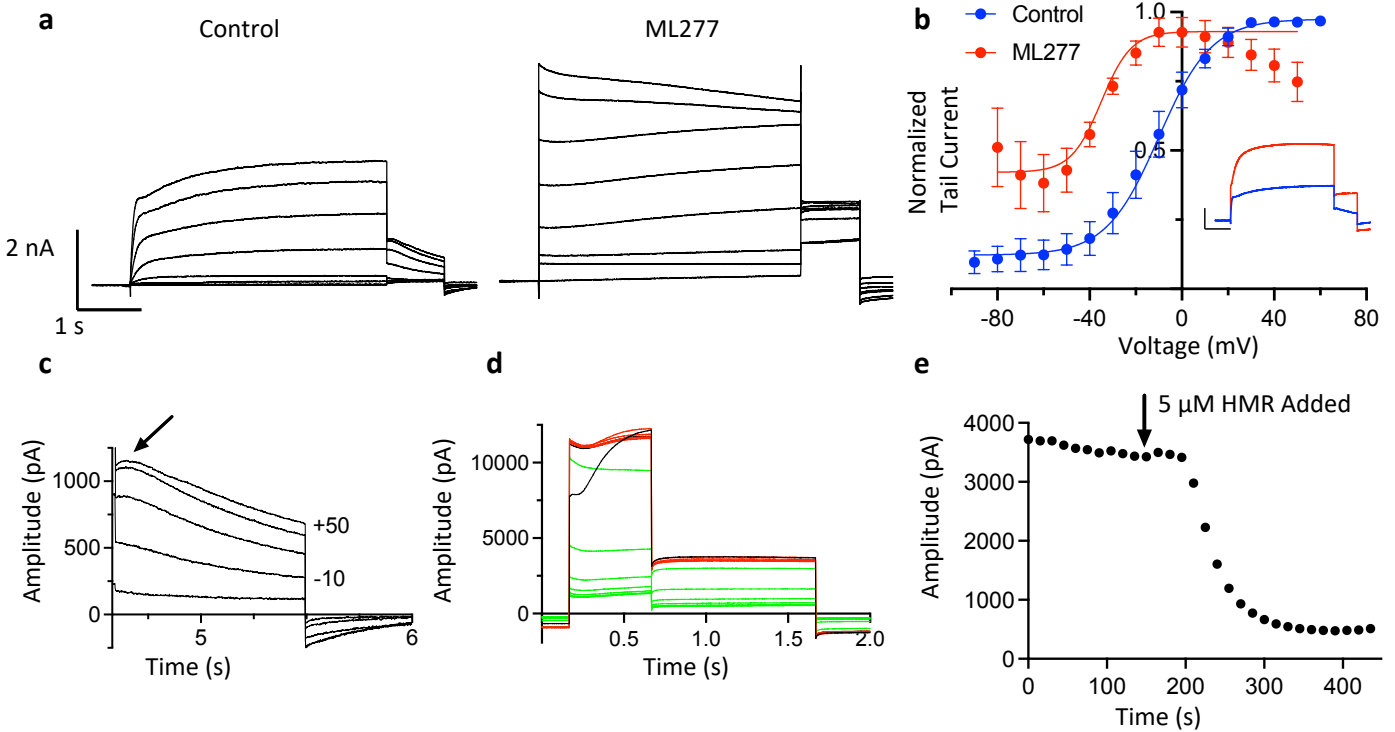

**Supplementary Fig. 1. The *Xenopus* construct used for cryo-EM expresses KCNQ1 with normal kinetics and is responsive to 1  $\mu$ M ML277**

(a) Control xKCNQ1 currents, and in 1  $\mu$ M ML277. Cells were held at -90 mV, pulsed from -90 or -80 to +60 mV in 10 mV steps for 4 s, then to -40 mV for 0.9 s. The interpulse interval was 15 s. Every other voltage is omitted for clarity. Note increase in pulse and tail current, and slowing of tail current decay caused by ML277, almost identical to effect seen on KCNQ1 (Fig. 7, Supplementary Fig. 9).

(b) G-V relationships for the xKCNQ1 channel cryo-EM construct currents expressed in tsA201 cells in control and the presence of 1  $\mu$ M ML277. Protocol as in (a). Tail currents were measured immediately upon repolarization to -40 mV and normalization was performed to the peak value during the step to -40 mV for each cell. Error bars denote mean  $\pm$  SEM, n = 4 cells for control and 5 cells for ML277. The  $V_{1/2}$  was  $-9.8 \pm 4.9$  mV in control and  $-41.2 \pm 4.0$  mV in ML277, source data are provided as a Source Data file. Inset panel shows single current tracings in control (blue) and ML277 (red) during pulses to +60 mV, and repolarization to -40 mV. Calibration bars are 2 nA and 1 s. The mean increase in xKCNQ1 tail currents on ML277 treatment was  $3.8 \pm 0.9$  (SEM), n = 3 cells.

(c) Tail currents recorded at -40 mV from the cryo-EM xQ1 construct, shown on an expanded time scale to show the hook in the tail currents after prepulses to -10 mV or more positive potentials that indicates inactivation is taking place during the test pulse. Tails were recorded using the same protocol as in (a).

(d) Effect of 5  $\mu$ M HMR1556 on xKCNQ1 currents during ML277 exposure. Pulses were to +60 mV for 0.5 s, with a repolarizing step to -40 mV for 1 s, applied every 15 s. Black trace is the first trace (shows effect of longer time at holding potential), red traces are control ML277 and green 1 min (and every 15 s subsequently) after HMR1556 added to bath. Note that tail currents decrease and are blocked completely in the presence of HMR1556.

(e) Diary plot of tail currents from data in (d).

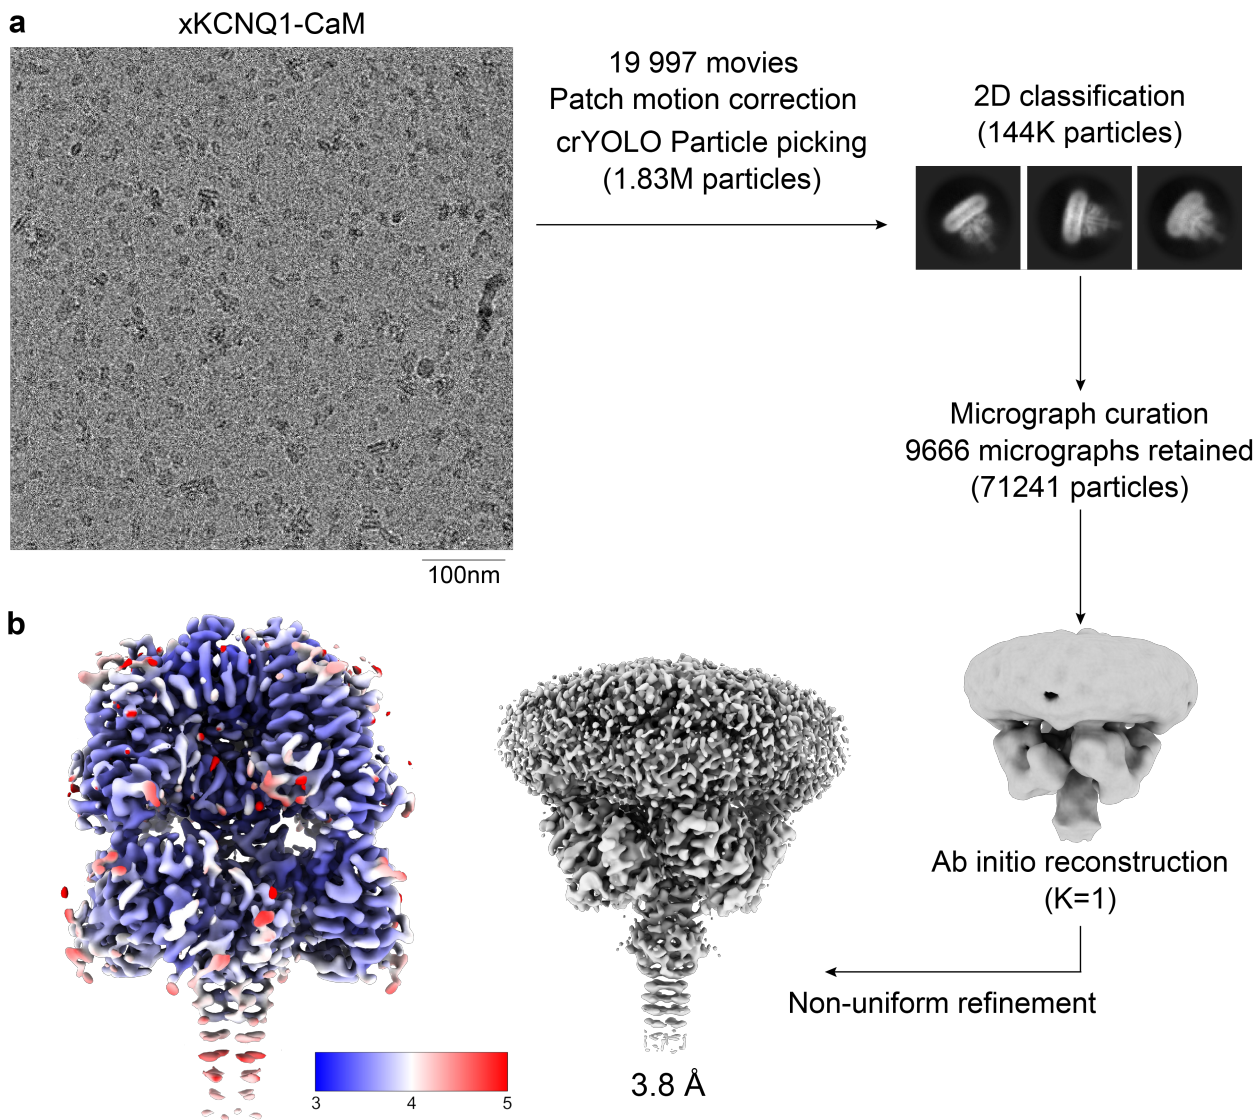

### Supplementary Fig. 2. Structure determination of xKCNQ1-CaM

(a) A representative micrograph for the xKCNQ1-CaM data set and the processing pipeline for structure determination carried out in cryoSPARC with the exception of the particle picking done in crYOLO, showing 2D classes and 3D reconstructions. Details of the processing strategy are described in the Methods section.

(b) Local resolution of the xKCNQ1-CaM cryo-EM density map calculated in cryoSPARC. Scale represents 3-5 Å.

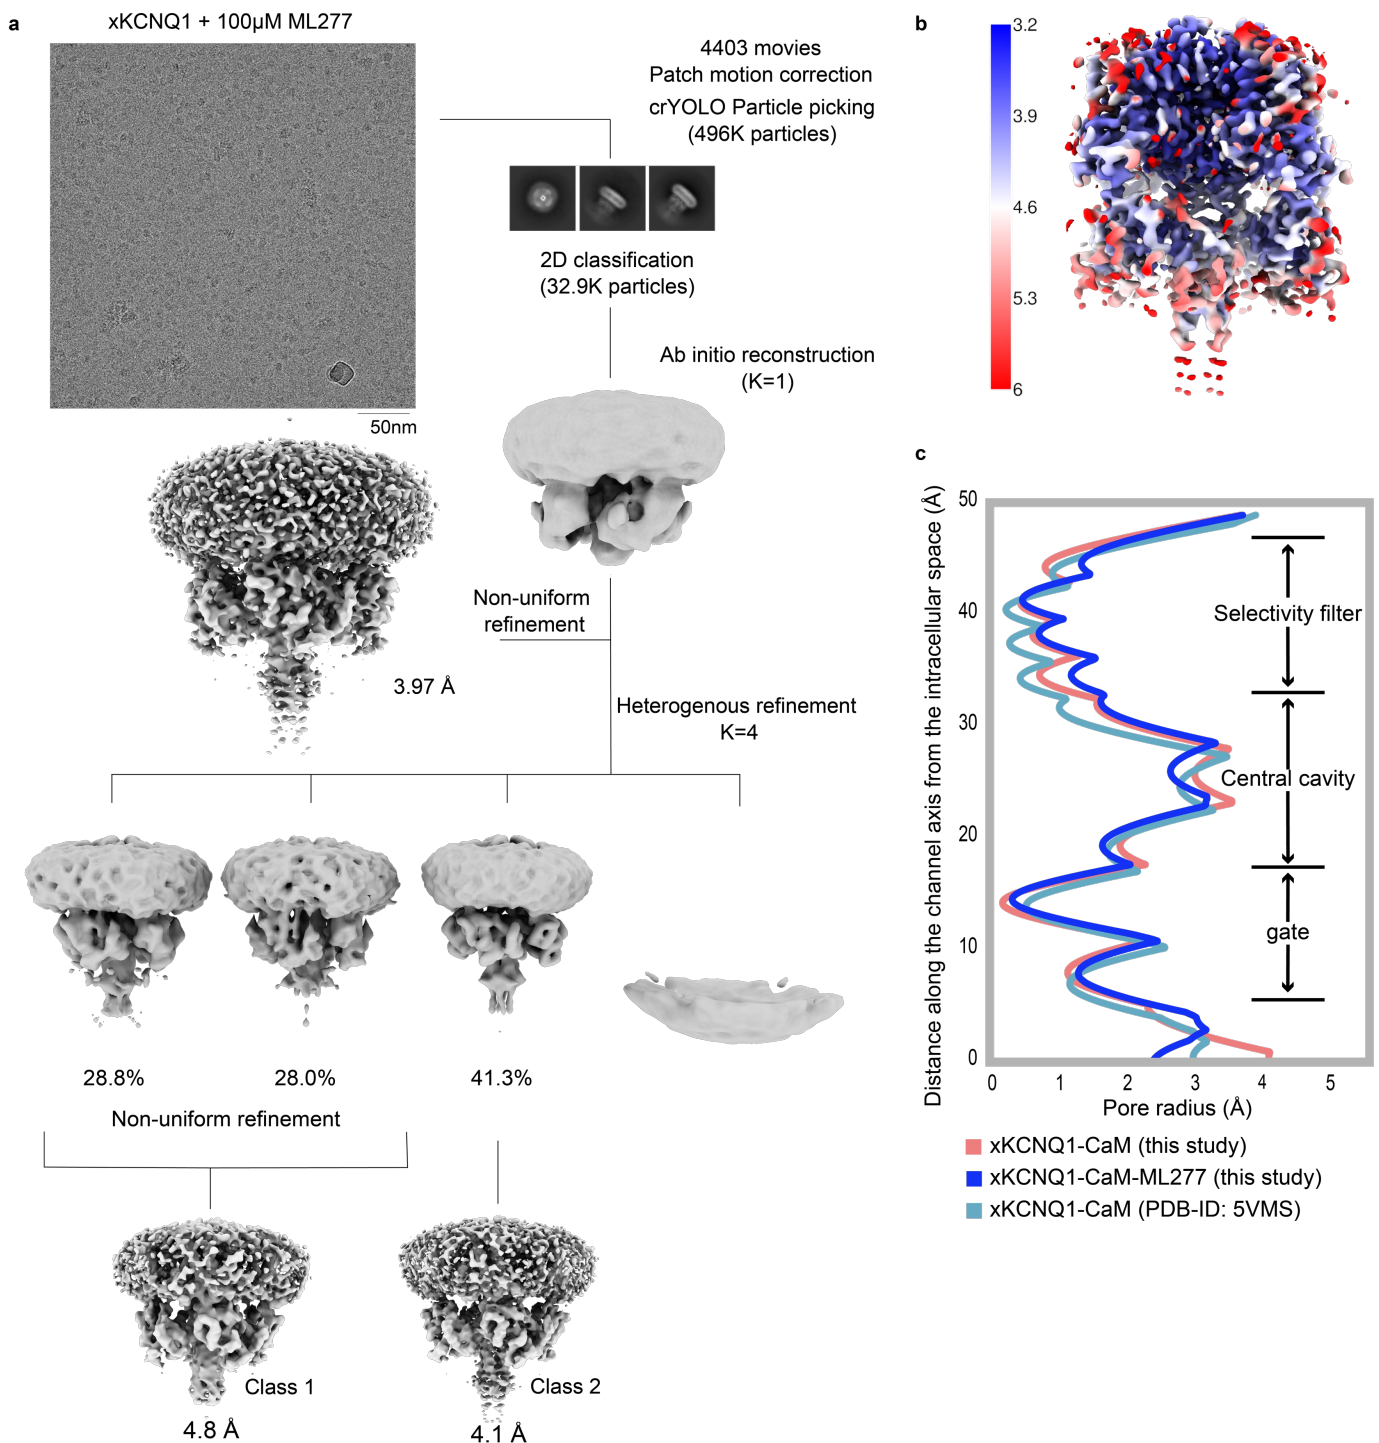

### Supplementary Fig. 3. Structure determination of xKCNQ1-CaM-ML277 (data set 1)

(a) Representative micrograph for the xKCNQ1-CaM-ML277 data set 1 and the processing pipeline for structure determination carried out in cryoSPARC with the exception of the particle picking done in crYOLO, showing 2D classes and 3D reconstructions. Details of the processing strategy are described in the Material and methods sections.

(b) Local resolution of the xKCNQ1-CaM-ML277 cryo-EM density map calculated in cryoSPARC. Scale represents 3.2-6.0 Å.

(c) Pore radius along the channel axis calculated with HOLE<sup>1</sup>. xKCNQ1-CaM, xKCNQ1-CaM-ML277 and xKCNQ1-CaM (PDB-ID: 5VMS<sup>2</sup>) are in a similar closed conformation. Scale is in Å.

xKCNQ1 + 100 $\mu$ M ML277

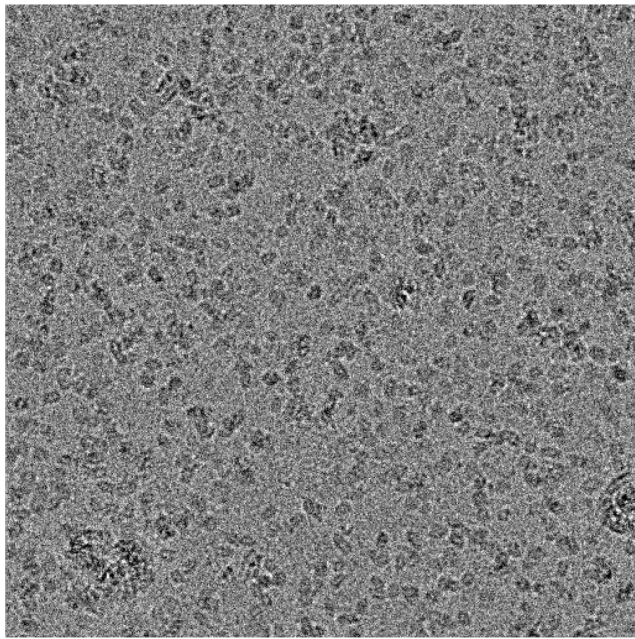

100nm

13 572 movies  
Patch motion correction  
crYOLO particle picking  
531 573 ptcls

2D classification  
(85.4K ptcls)

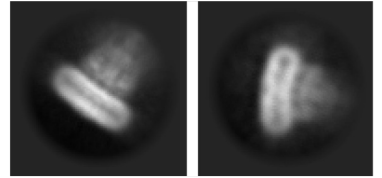

Ab initio reconstruction  
(K=2)

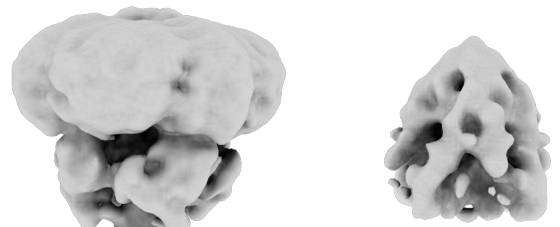

62.5%

37.5%

Homogeneous refinement

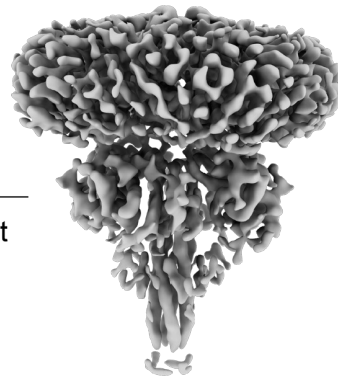

Non-uniform refinement

4.8 Å

#### Supplementary Fig. 4. Structure determination of xKCNQ1-CaM-ML277 (data set 2)

Representative micrograph and the pipeline of xKCNQ1-CaM-ML277 structure determination for the second data set carried out in cryoSPARC with the exception of particle picking done in crYOLO.

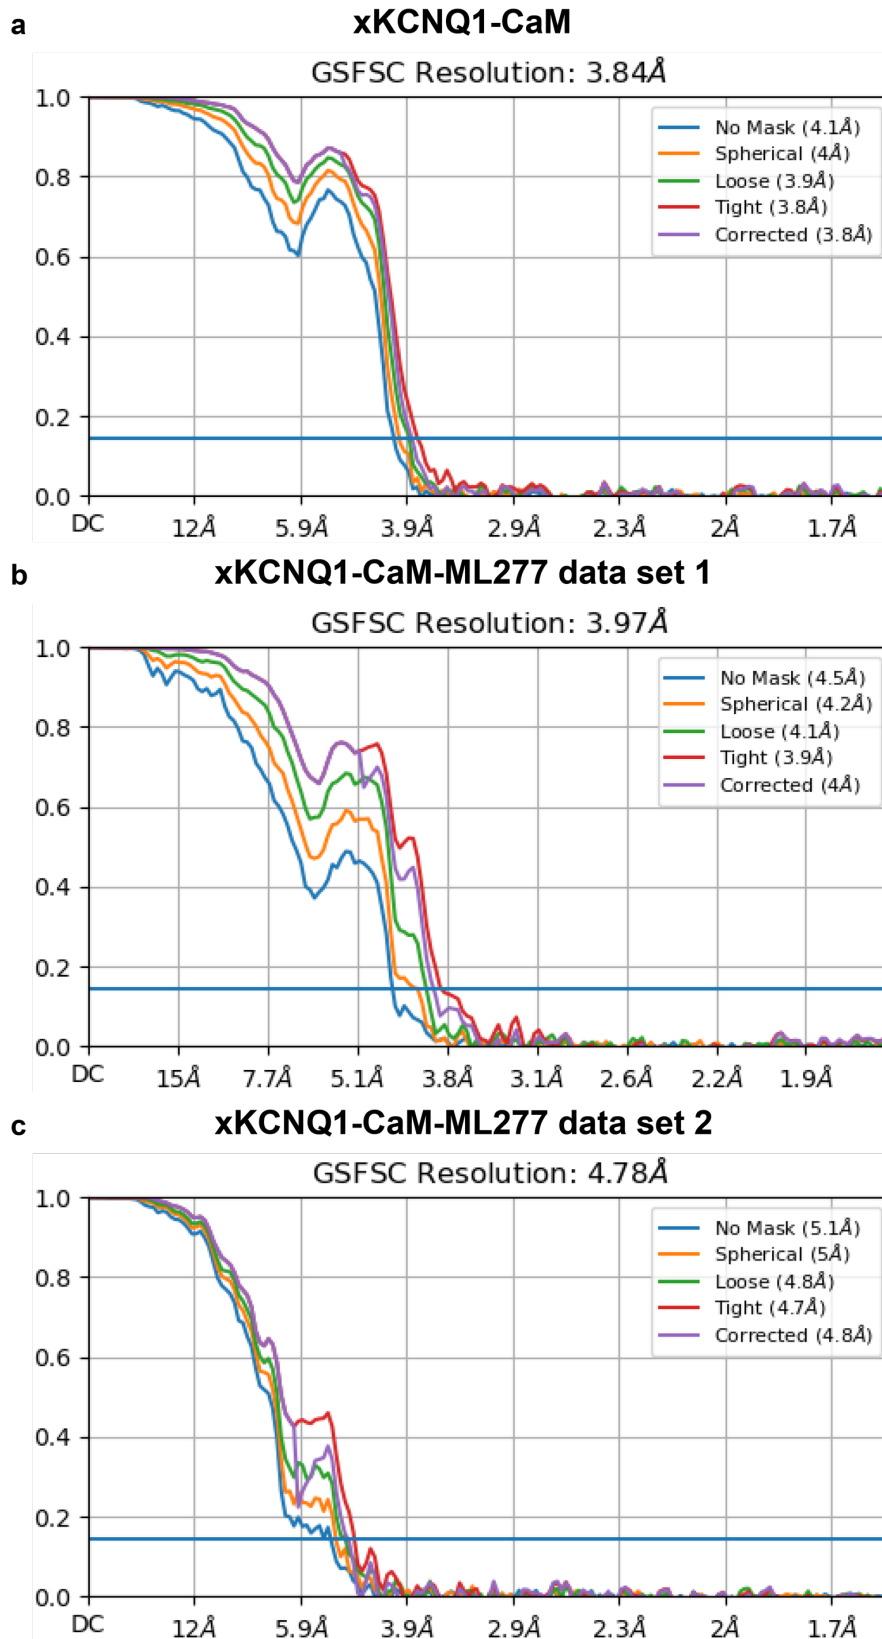

**Supplementary Fig. 5. Gold standard Fourier shell correlation (FSC) curves as generated by cryoSPARC**

(a) FSC curves of final maps for xKCNQ1-CaM.

(b) xKCNQ1-CaM-ML277 data set 1.

(c) xKCNQ1-CaM-ML277 data set 2

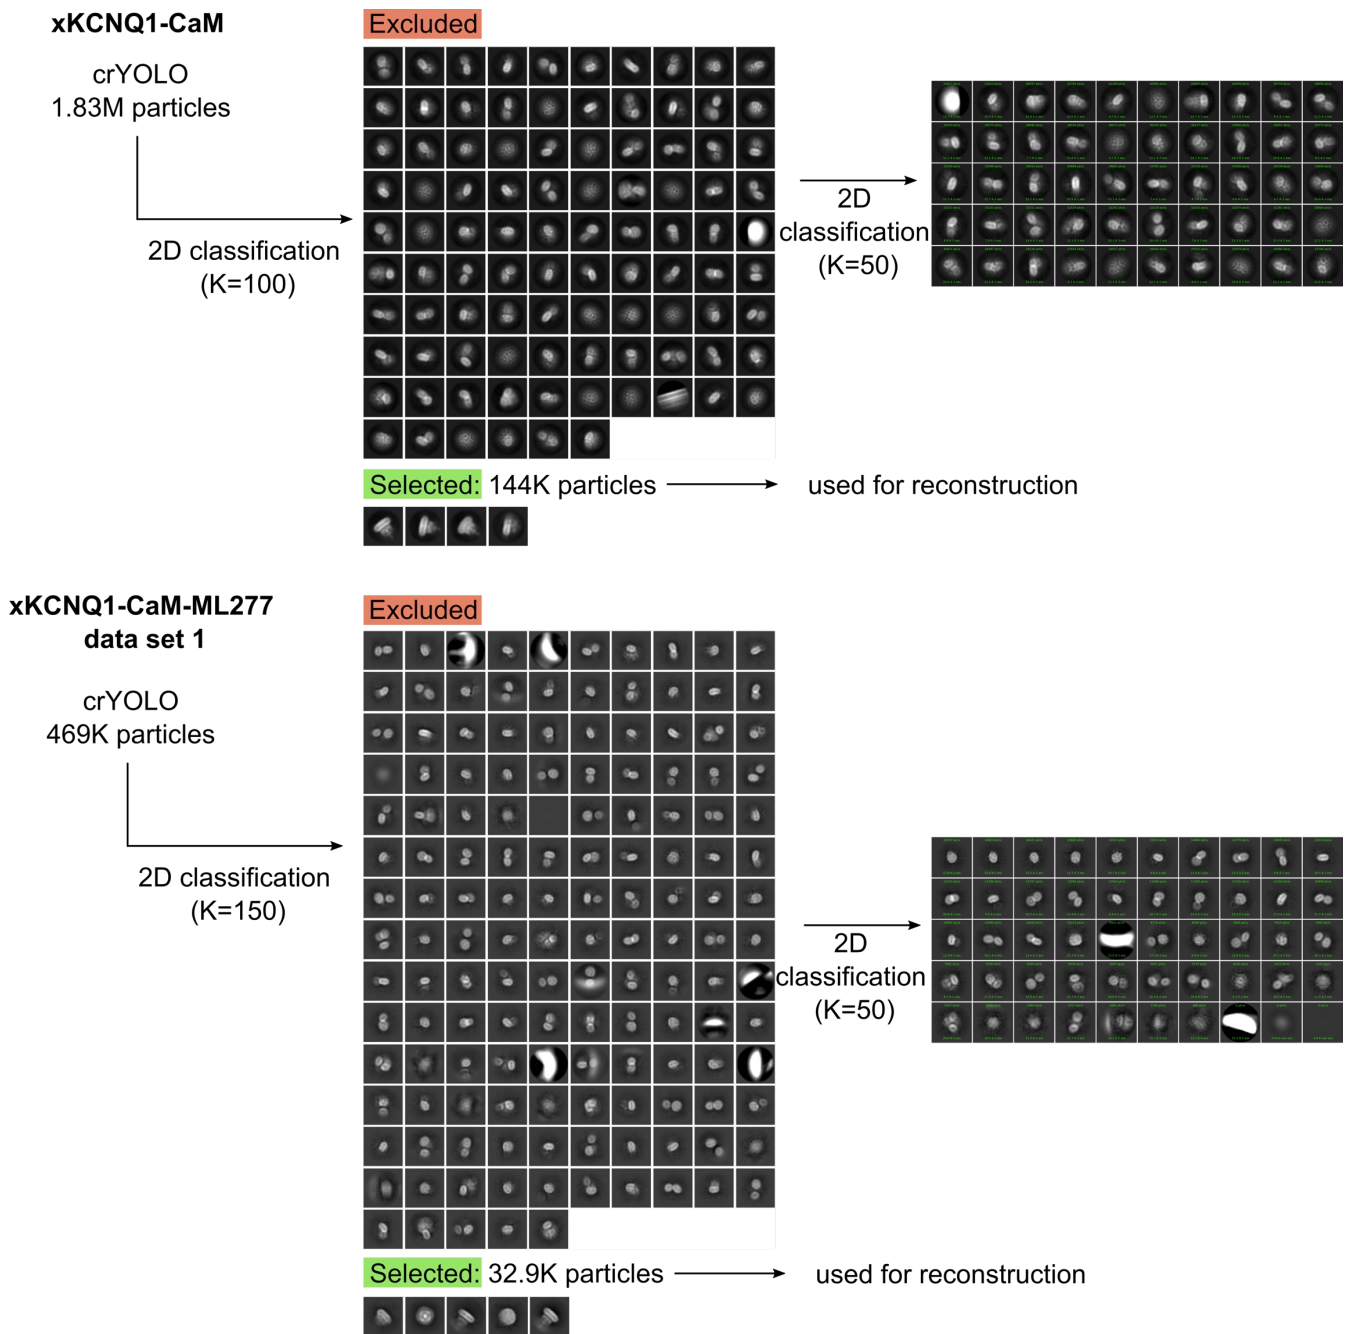

### Supplementary Fig. 6. Exploration of excluded 2D classes

For the xKCNQ1-CaM dataset (above) and xKCNQ1-CaM-ML277 data set 1 (below), particles from classes resembling 2D projections of KCNQ were used for 3D reconstructions. Particles from excluded classes were used for an additional round of 2D classification (K=50) and showed no classes representing KCNQ projections.

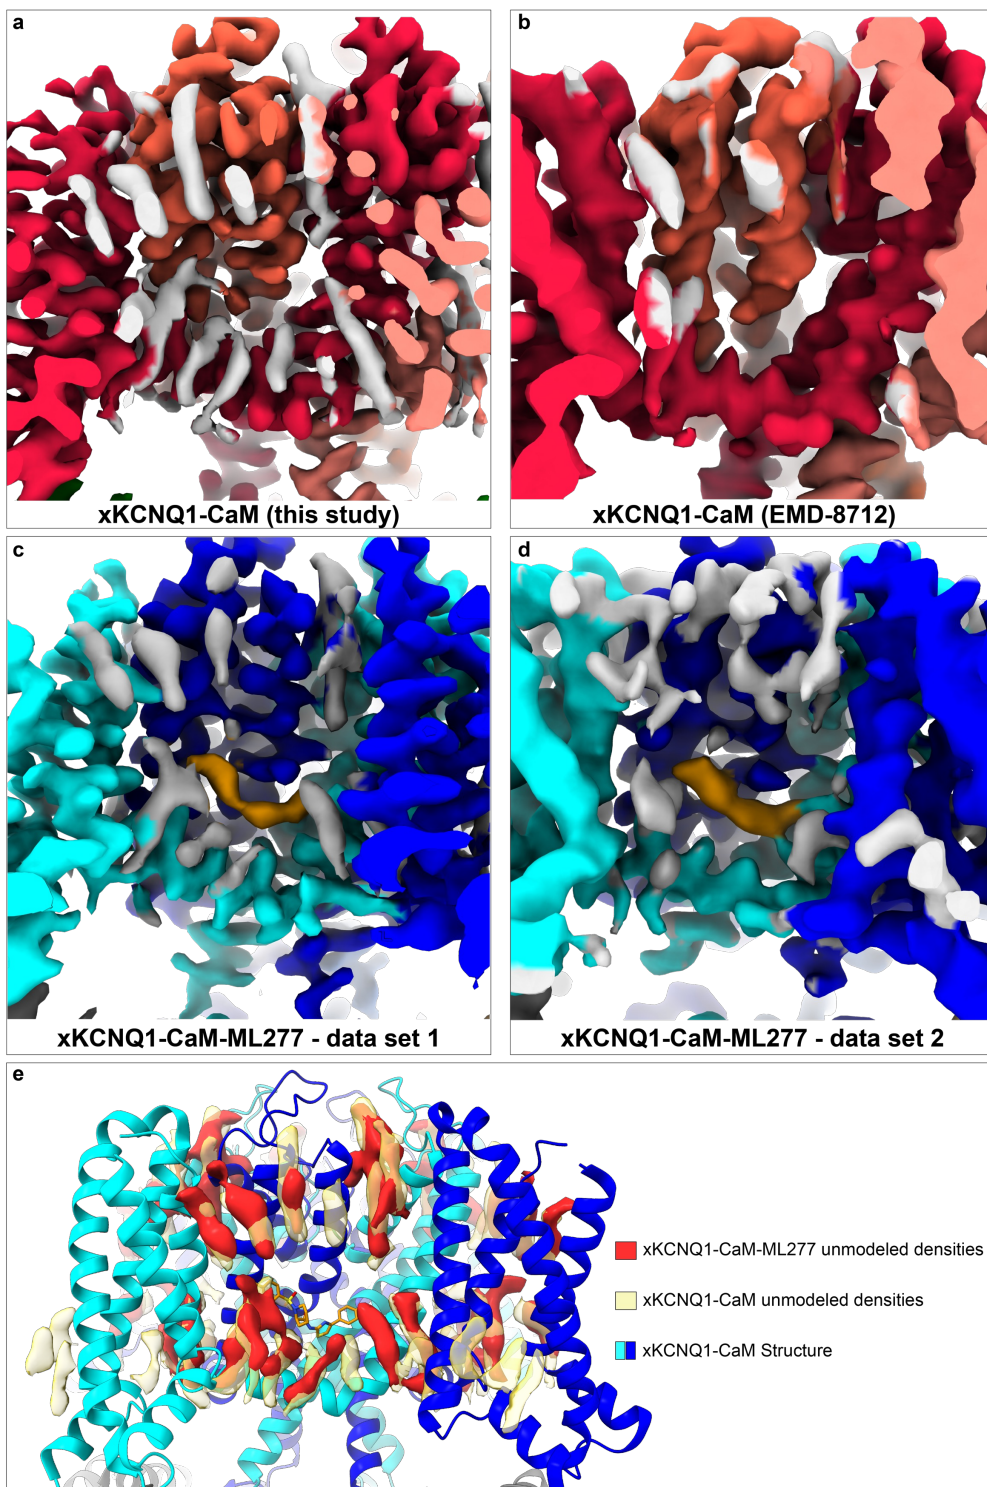

**Supplementary Fig. 7. Comparison of the TM region of two independent xKCNQ1-CaM and two independent xKCNQ1-CaM-ML277 data sets**

(a-d) Focus on TM region corresponding to potential ML277 binding sites in two xKCNQ1-CaM (a, b; this study and EMD-8712<sup>2</sup>) and two xKCNQ1-CaM-ML277 (c, d; this study) cryo-EM density maps. The additional density corresponding to ML277 is colored orange and unmodeled densities, likely corresponding to detergent molecules, are indicated in grey.

(e) Superposition of the unmodeled densities onto xKCNQ1-CaM-ML277 structure shows that there is no other unique density in the xKCNQ1-CaM-ML277 map that could fit the elongated shape of ML277.

ChimeraX ('color zone') was used for coloring the density based on the fitted models with a cut off distance for coloring set at 3.5 Å, leading to partial coloring of unmodeled densities in some panels.



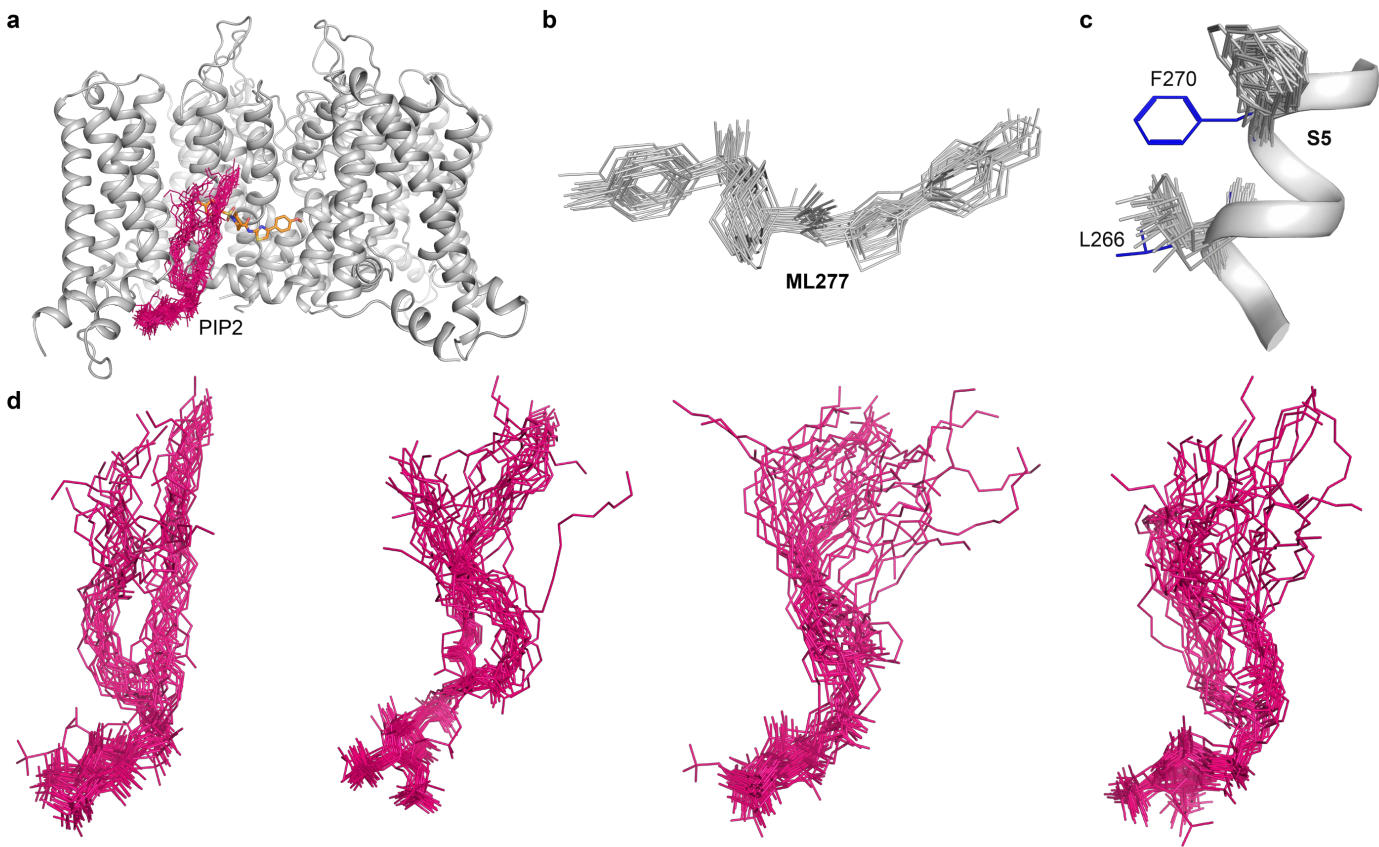

**Supplementary Fig. 8. MD simulations of ML277 in the presence of PIP2.**

a) Superposition of PIP2 coordinates from MD simulation. ML277 is bound to the open pore channel hKCNQ1-KCNE3-PIP2 (PDB-ID: 6V01<sup>3</sup>), with KCNE3 removed.

b) Superposition of ML277 coordinates from MD simulations.

c) Re-orientation of F270 and L266 in hKCNQ1-PIP2-ML277 during MD simulation. Note that sidechain orientation now matches that seen in the cryo-EM xKCNQ1-CaM structure (Fig.2, Fig.4). Initial positions for these residues in hKCNQ1-CaM-KCNE3-PIP2 structure are shown in blue.

d) Superposition of 80 poses (20 in each of the sub-panels) of PIP2 highlights the flexibility of the lipid tail.

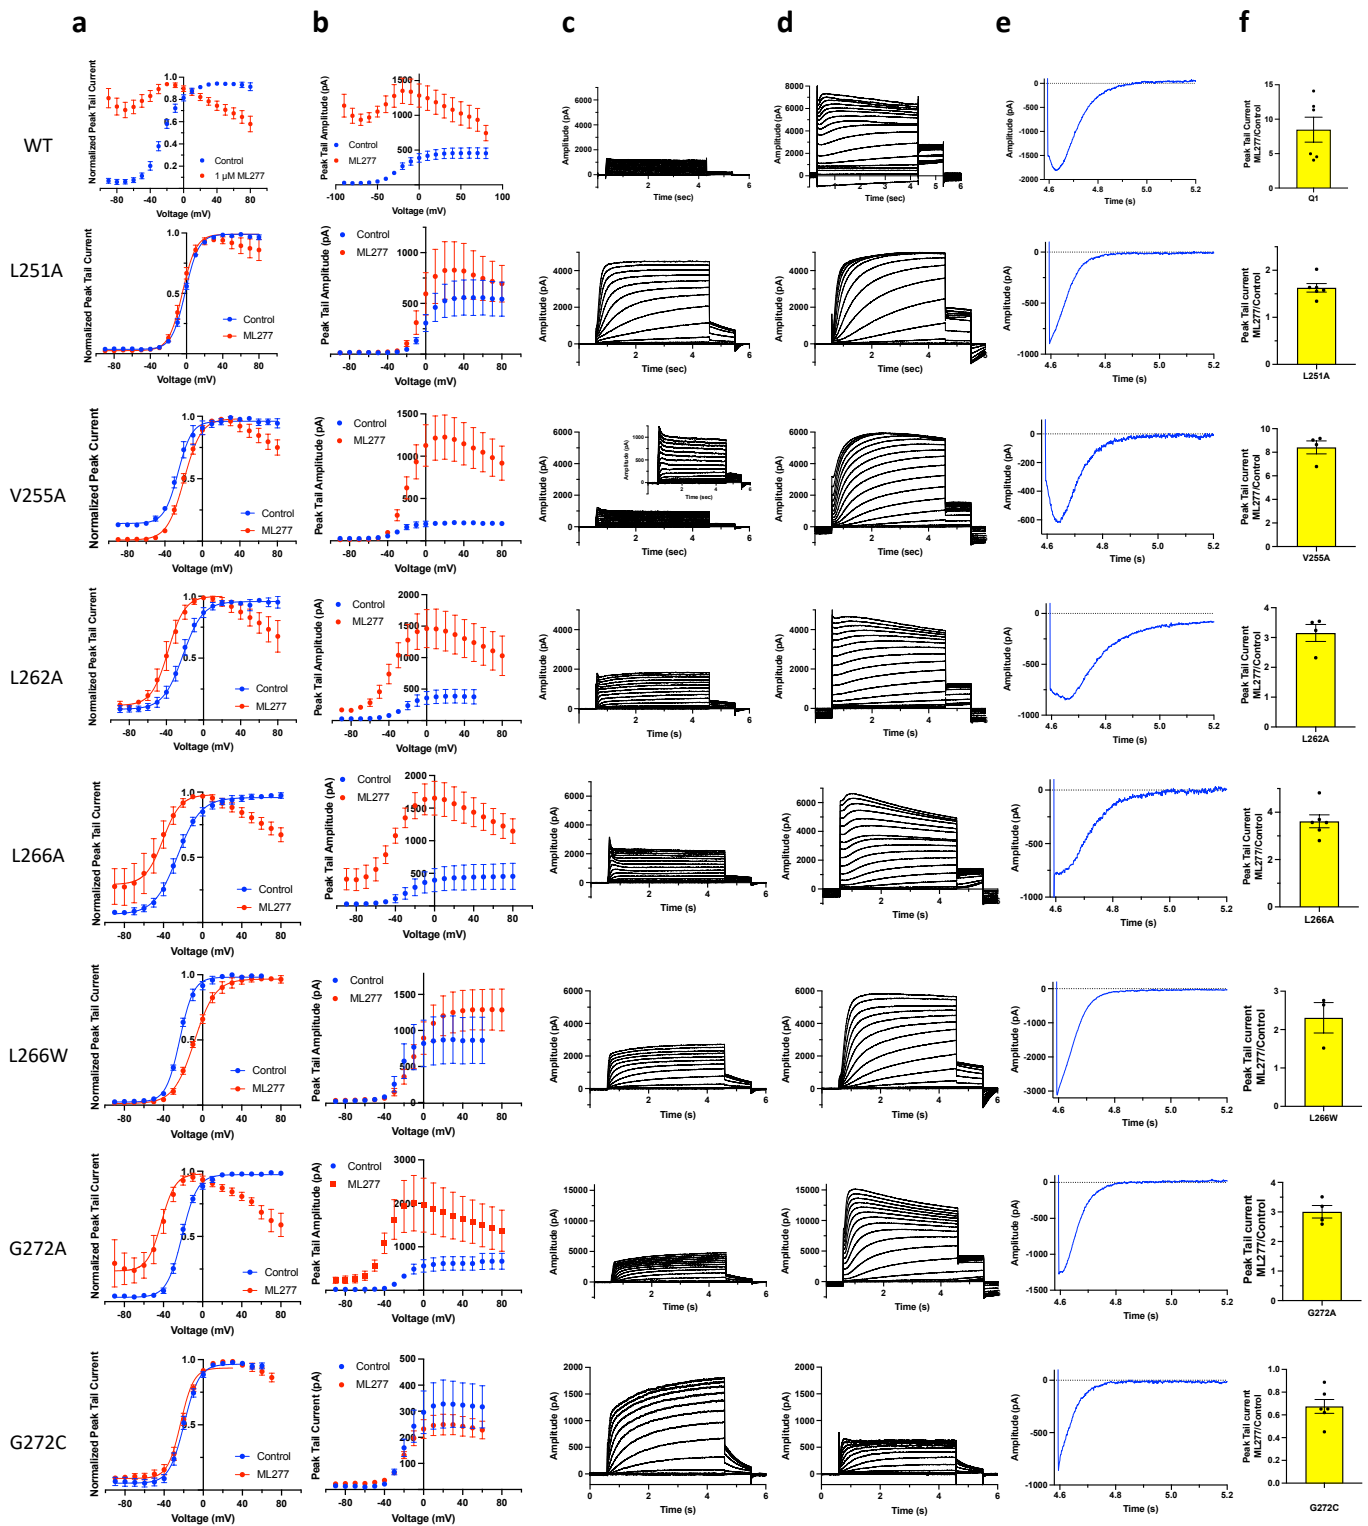

### Supplementary Fig. 9. Compiled electrophysiological data from WT and ML277 binding site mutants

(a and b) Normalized and un-normalized peak tail current-voltage (G-V) relationships in control (blue) and in 1  $\mu$ M ML277 (red). Data are shown mean  $\pm$  SEM, n = 3-17 cells (see Supplementary Table 3 for exact n values). (c and d) Current traces in control (c) and after addition of 1  $\mu$ M ML277 (d). Cells were held at -90 mV, pulsed to +60 mV for 4 s, then -40 mV for 0.9 s. The interpulse interval was 15 s. (e) Tail currents obtained at -120 mV after 4 s pulses to +60 mV in the absence of ML277 for different mutants as indicated. (f) KCNQ1 tail current amplitudes in ML277 divided by initial control current, protocol as in A. Error bars denote mean  $\pm$  SEM. Individual measures are shown, n = 3-8 cells, (see Supplementary Table 2 for exact n values). Source data are provided as a Source Data file.

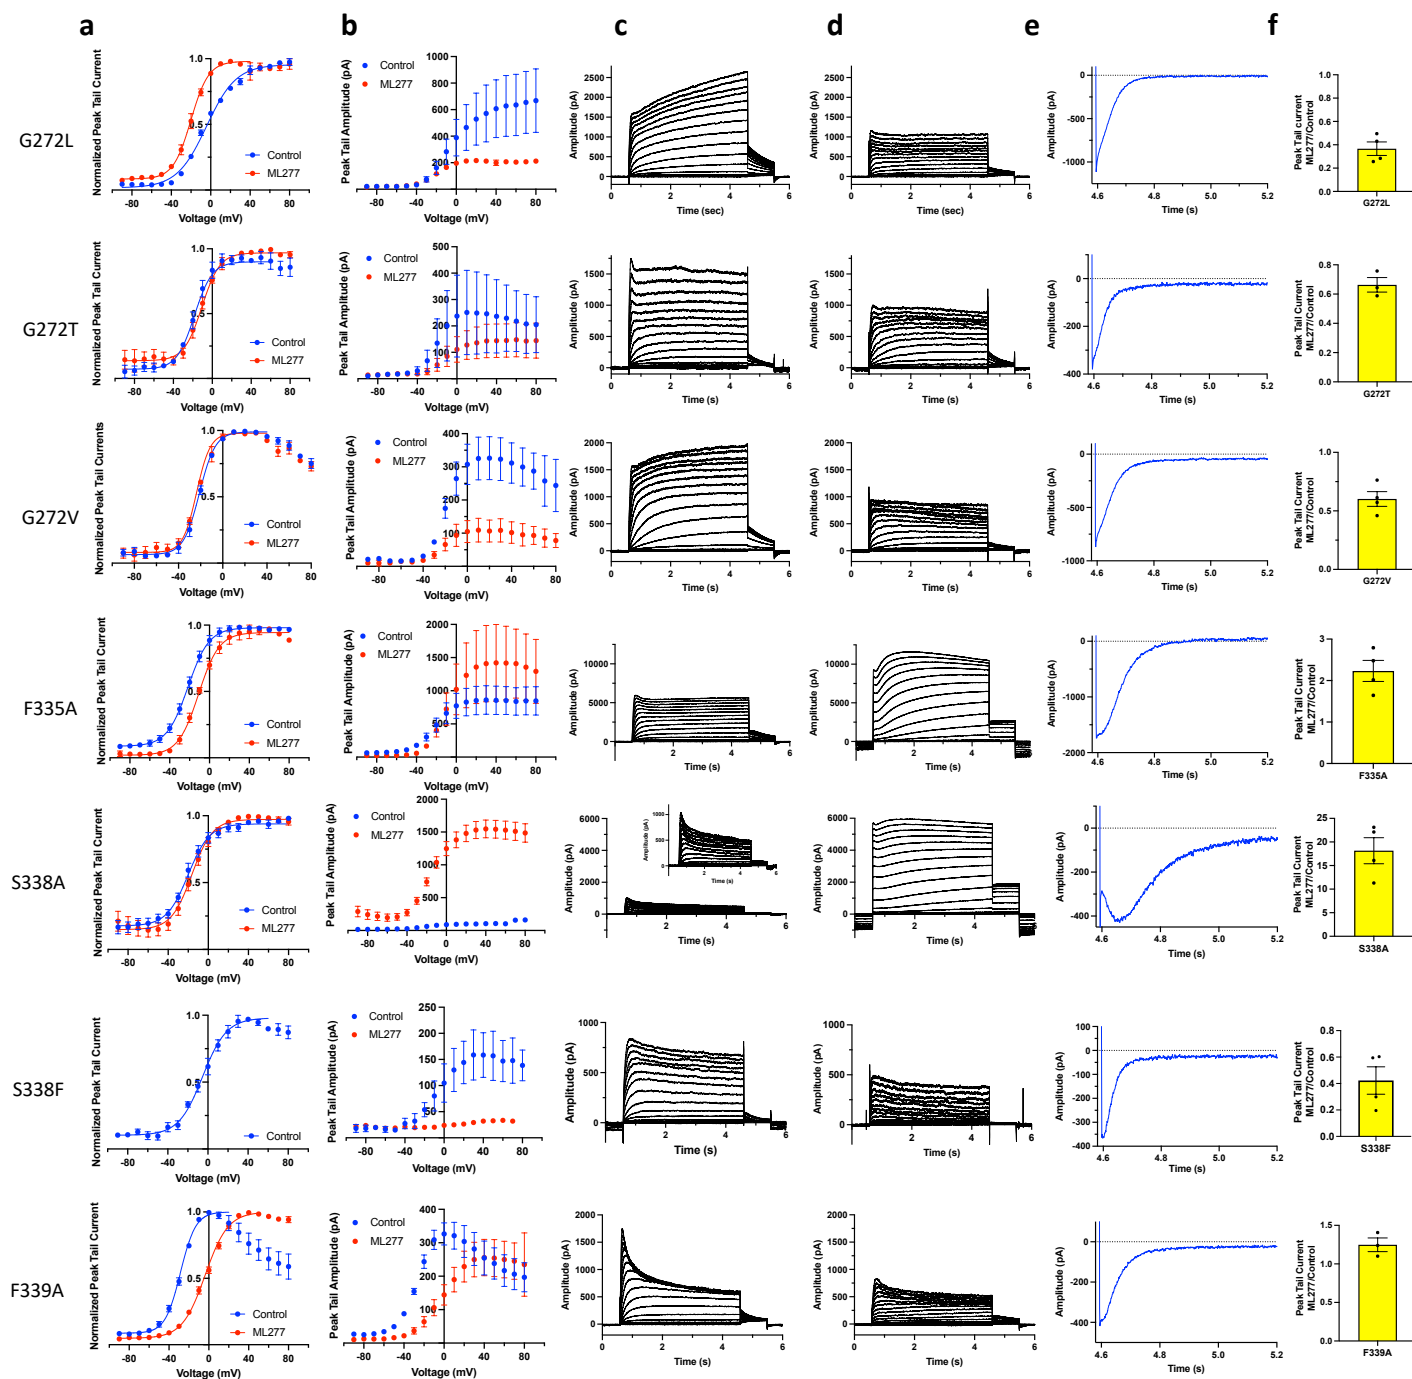

**Supplementary Fig. 9, continued. Compiled electrophysiological data from WT and ML277 binding site mutants** (a and b) Normalized and un-normalized peak tail current-voltage (G-V) relationships in control (blue) and in 1  $\mu$ M ML277 (red). Data are shown mean  $\pm$  SEM,  $n = 3-17$ , (see Supplementary Table 3 for exact  $n$  values). (c and d) Current traces in control (c) and after addition of 1  $\mu$ M ML277 (d). Cells were held at -90 mV, pulsed to +60 mV for 4 s, then -40 mV for 0.9 s. The interpulse interval was 15 s. (e) Tail currents obtained at -120 mV after 4 s pulses to +60 mV in the absence of ML277 for different mutants as indicated. (f) KCNQ1 tail current amplitudes in ML277 divided by initial control current, protocol as in A. Error bars denote mean  $\pm$  SEM. Individual measures are shown,  $n = 3-8$  (see Supplementary Table 2 for exact  $n$  values). Source data are provided as a Source Data file.

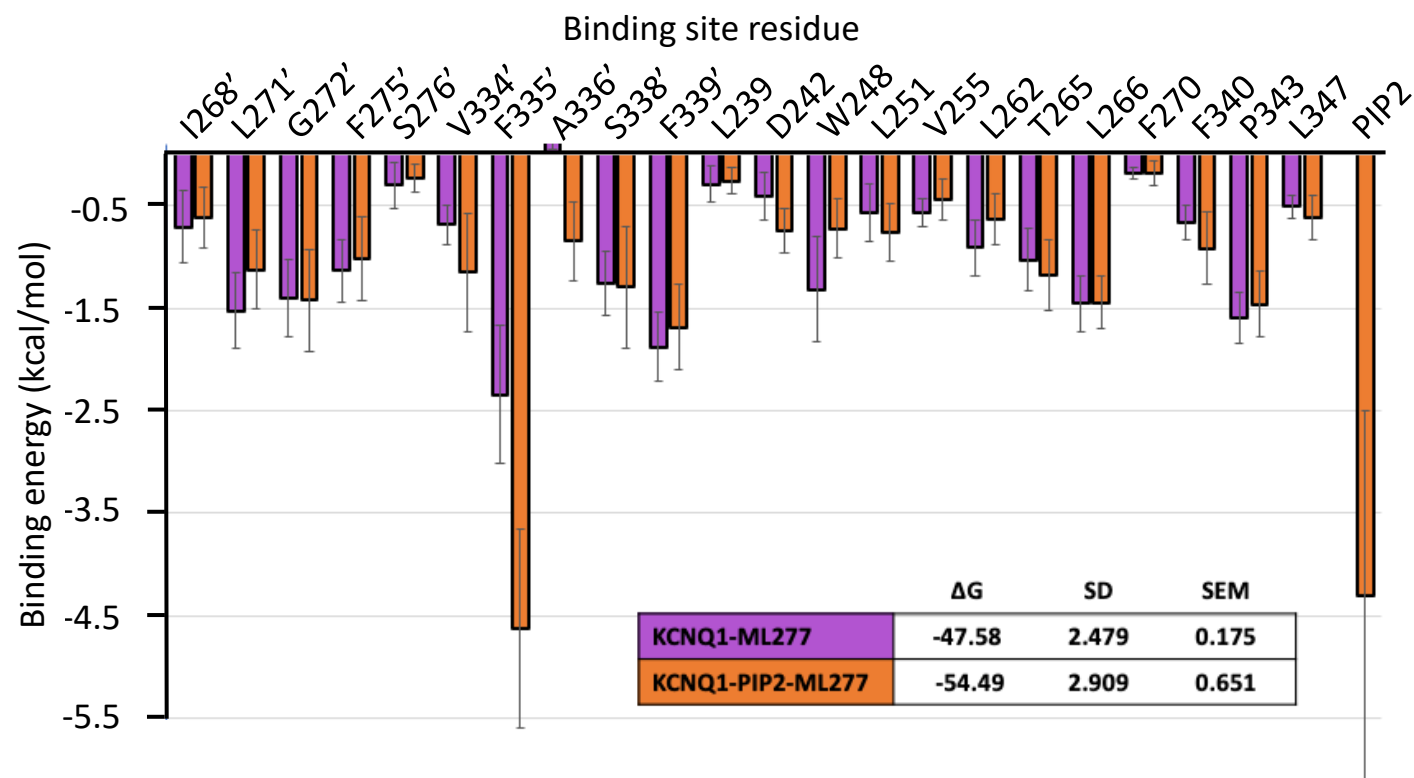

**Supplementary Fig. 10. Binding free energy per-residue decomposition.**

Binding energies of residues interacting with ML277 in hKCNQ1-ML277 and hKCNQ1-PIP2-ML277 complexes calculated with the MM/PBSA method. Residues from two subunits comprising the binding pocket are listed above, with the apostrophe denoting residues in the second protomer. Mean binding energy per residue is shown by the horizontal bar line, above and below which error bars show SD of the binding energy during MD simulation. The SD and SEM are of energy fluctuations between the 200 snapshots used (see Free Energy calculations in Methods).

|              | xKCNQ1 | hKCNQ1 | hKCNQ2 | KCNQ3  | hKCNQ4 | hKCNQ5 |
|--------------|--------|--------|--------|--------|--------|--------|
| S4-S5 Linker | Trp238 | Trp248 | Trp218 | Trp247 | Trp224 | Trp252 |
|              | Leu241 | Leu251 | Leu221 | Leu250 | Leu227 | Leu255 |
|              | Val245 | Val255 | Val225 | Ile254 | Val231 | Val259 |
| S5           | Leu252 | Leu262 | Leu232 | Leu261 | Leu238 | Leu266 |
|              | Thr255 | Thr265 | Ala235 | Ala264 | Ala241 | Ala269 |
|              | Leu256 | Leu266 | Trp236 | Trp265 | Trp242 | Trp270 |
|              | Phe260 | Phe270 | Phe240 | Phe269 | Phe246 | Phe274 |
| S6           | Pro333 | Pro343 | Pro308 | Pro347 | Pro314 | Pro342 |
|              | Leu337 | Leu347 | Leu312 | Leu351 | Leu318 | Leu346 |
| S5'          | Ile258 | Ile268 | Ile238 | Ile267 | Ile244 | Ile272 |
|              | Leu261 | Leu271 | Leu241 | Leu270 | Leu247 | Leu275 |
|              | Gly262 | Gly272 | Cys242 | Thr271 | Val248 | Val276 |
|              | Phe265 | Phe275 | Leu245 | Leu274 | Phe251 | Phe279 |
| S6'          | Phe322 | Phe332 | Phe297 | Phe336 | Phe303 | Phe331 |
|              | Val324 | Val334 | Leu299 | Leu338 | Leu305 | Leu333 |
|              | Phe325 | Phe335 | Ile300 | Ile339 | Leu306 | Leu334 |
|              | Ala326 | Ala336 | Gly301 | Gly340 | Gly307 | Gly335 |
|              | Ser328 | Ser338 | Ser303 | Ser342 | Ser309 | Ser337 |
|              | Phe329 | Phe339 | Phe304 | Phe343 | Phe310 | Phe338 |

**Supplementary Table 1. Residues in the xKCNQ1-CaM ML277-binding site** compared with the homologous residues in other KCNQ isoforms. Residues that differ are indicated in red. The apostrophe denotes residues in the second subunit protomer.

|       | Control        |   | ML277          |   |          |
|-------|----------------|---|----------------|---|----------|
|       | Mean $\pm$ SEM | n | Mean $\pm$ SEM | n | P value  |
| WT    | 320 $\pm$ 61   | 8 | 2116 $\pm$ 274 | 8 | p=0.0002 |
| L251A | 467 $\pm$ 152  | 6 | 752 $\pm$ 246  | 6 | p=0.0328 |
| V255A | 181 $\pm$ 20   | 4 | 1501 $\pm$ 151 | 4 | p=0.0024 |
| L262A | 403 $\pm$ 83   | 4 | 1298 $\pm$ 338 | 6 | p=0.0409 |
| L266A | 427 $\pm$ 70   | 6 | 1483 $\pm$ 215 | 6 | p=0.0009 |
| L266W | 531 $\pm$ 189  | 5 | 1122 $\pm$ 302 | 5 | p=0.0210 |
| G272A | 678 $\pm$ 142  | 5 | 1873 $\pm$ 378 | 5 | p=0.0083 |
| G272C | 296 $\pm$ 49   | 6 | 197 $\pm$ 37   | 6 | p=0.0101 |
| G272T | 132 $\pm$ 28   | 4 | 86 $\pm$ 25    | 4 | p=0.0032 |
| G272V | 231 $\pm$ 54   | 4 | 132 $\pm$ 28   | 4 | p=0.0421 |
| G272L | 602 $\pm$ 217  | 4 | 220 $\pm$ 67   | 4 | ns       |
| F335A | 768 $\pm$ 187  | 4 | 1715 $\pm$ 432 | 4 | p=0.0405 |
| S338A | 121 $\pm$ 31   | 5 | 1665 $\pm$ 234 | 5 | p=0.0020 |
| S338F | 147 $\pm$ 32   | 5 | 59.0 $\pm$ 12  | 5 | p=0.0239 |
| F339A | 221 $\pm$ 47   | 3 | 273 $\pm$ 51   | 3 | ns       |

**Supplementary Table 2: Mean tail current amplitudes before and after 1  $\mu$ M ML277.** Cells were held at -90 mV and pulsed to +60 mV for 4 s, then to -40 mV for 0.9 s, with an interpulse interval of 15 s. Statistical comparisons were performed using a two-tailed paired t-tests in GraphPad Prism, n represents individual cells.

|       | Control         |                |    | ML277           |                |    | P value   |
|-------|-----------------|----------------|----|-----------------|----------------|----|-----------|
|       | $V_{1/2}$       | slope          | n  | $V_{1/2}$       | slope          | n  |           |
| WT*   | $-23.0 \pm 1.7$ | $11.9 \pm 1.0$ | 17 | -               | -              | 10 | -         |
| L251A | $-1.3 \pm 0.8$  | $7.4 \pm 0.5$  | 5  | $-4.5 \pm 2.0$  | $7.5 \pm 0.5$  | 5  | ns        |
| V255A | $-25.9 \pm 3.2$ | $9.1 \pm 2.4$  | 3  | $-19.5 \pm 1.4$ | $9.1 \pm 0.8$  | 4  | ns†       |
| L262A | $-22.2 \pm 2.8$ | $10.7 \pm 1.5$ | 4  | $-39.4 \pm 3.5$ | $7.6 \pm 0.3$  | 4  | p=0.0086  |
| L266A | $-25.6 \pm 1.9$ | $11.9 \pm 0.8$ | 5  | $-40.5 \pm 3.5$ | $9.0 \pm 0.7$  | 4  | p=0.0056† |
| L266W | $-23.1 \pm 1.0$ | $7.2 \pm 1.0$  | 3  | $-8.2 \pm 0.9$  | $11.0 \pm 1.6$ | 3  | p=0.0051  |
| G272A | $-21.0 \pm 1.1$ | $7.8 \pm 0.7$  | 5  | $-42.2 \pm 3.5$ | $7.2 \pm 0.4$  | 4  | p=0.0004† |
| G272C | $-19.5 \pm 1.2$ | $7.7 \pm 0.8$  | 4  | $-23.1 \pm 3.5$ | $7.1 \pm 0.9$  | 4  | ns        |
| G272T | $-17.4 \pm 3.0$ | $7.4 \pm 1.3$  | 3  | $-11.2 \pm 1.0$ | $8.9 \pm 0.8$  | 4  | ns†       |
| G272V | $-21.1 \pm 1.5$ | $7.2 \pm 0.7$  | 4  | $-23.7 \pm 1.3$ | $6.2 \pm 0.7$  | 4  | ns        |
| G272L | $-4.2 \pm 0.5$  | $15.1 \pm 0.7$ | 4  | $-20.2 \pm 2.1$ | $9.0 \pm 0.6$  | 3  | p=0.0003† |
| F335A | $-21.6 \pm 1.7$ | $10.7 \pm 1.5$ | 4  | $-10.9 \pm 1.1$ | $10.3 \pm 0.7$ | 3  | p=0.0049† |
| S338A | $-20.1 \pm 3.1$ | $10.7 \pm 1.5$ | 6  | $-14.3 \pm 2.7$ | $10.1 \pm 0.8$ | 5  | ns†       |
| S338F | $-5.3 \pm 2.9$  | $11.9 \pm 0.6$ | 3  | -               | -              | 3  | -         |
| F339A | $-28.5 \pm 0.8$ | $7.7 \pm 0.3$  | 3  | $-3.7 \pm 1.0$  | $11.5 \pm 1.1$ | 3  | p<0.0025  |

### Supplementary Table 3: $V_{1/2}$ of activation and slope of G-V plots

$V_{1/2}$  of activation was obtained from tail current amplitude at the start of the -40 mV step of voltage-clamp protocols (-90 mV holding potential, pulsed from -90 up to +60 to +100 mV in 10 mV steps for 4 s, then to -40 mV for 1 s, with an interpulse interval of 15 s). Statistical comparison was performed using two-tailed paired (when a before and after drug set of data was collected per cell) or unpaired t-tests (when a before or after drug GV was missing for a cell(s)) in GraphPad Prism.

\* Some WT data are from Eldstrom et al., 2021<sup>4</sup>.

† indicates an unpaired t-test was used because not all data were matched.

| Data collection and processing                      | KCNQ1-CaM-ML277<br>(PDB-ID: 7TCI) | KCNQ1-CaM<br>(PDB-ID: 7TCP) |
|-----------------------------------------------------|-----------------------------------|-----------------------------|
| Magnification                                       | 96,000                            | 165,000                     |
| Voltage (kV)                                        | 300                               | 300                         |
| Electron exposure (e <sup>-</sup> /Å <sup>2</sup> ) | 50                                | 50                          |
| Defocus range (μm)                                  | -0.5-3                            | -0.5-3                      |
| Pixel size (Å)                                      | 0.85                              | 0.77                        |
| Symmetry imposed                                    | Point, C4                         | Point, C4                   |
| Initial particle images (no.)                       | 496,000                           | 1,830,000                   |
| Final particle images (no.)                         | 32,900                            | 71,241                      |
| Map resolution (Å)                                  |                                   |                             |
| FSC threshold                                       | 0.143                             | 0.143                       |
| Map resolution range (Å)                            | 3.0-5.0                           | 3.2-6.0                     |
|                                                     |                                   |                             |
| Refinement                                          |                                   |                             |
| Initial model used (PDB code)                       | 5VMS                              | 5VMS                        |
| Model resolution (Å)                                | 3.9                               | 3.84                        |
| FSC threshold                                       |                                   |                             |
| Model resolution range (Å)                          | 3.0-5.0                           | 3.2-6.0                     |
| Map sharpening B factor (Å <sup>2</sup> )           | 115.7                             | 148.7                       |
| Model composition                                   |                                   |                             |
| Non-hydrogen atoms                                  | 14992                             | 15084                       |
| Protein residues                                    | 1912                              | 1916                        |
| Ligands                                             | 12                                | 16                          |
| B factors (Å <sup>2</sup> )                         |                                   |                             |
| Protein                                             | 78.77                             | 5.98                        |
| Ligand                                              | 32.24                             | 10.22                       |
| R.M.S. deviations                                   |                                   |                             |
| Bond lengths (Å)                                    | 0.002                             | 0.002                       |
| Bond angles (°)                                     | 0.408                             | 0.365                       |
| Validation                                          |                                   |                             |
| MolProbity score                                    | 1.41                              | 1.78                        |
| Clashscore                                          | 6.68                              | 3.91                        |
| Poor rotamers (%)                                   | 3.15                              | 1.33                        |
| Ramachandran plot                                   |                                   |                             |
| Favored (%)                                         | 98.04                             | 98.14                       |
| Allowed (%)                                         | 1.96                              | 1.86                        |
| Disallowed (%)                                      | 0.00                              | 0.00                        |

**Supplementary Table 4: Cryo-EM data collection, refinement and validation statistics.**



## Supplementary References

- 1 Smart, O. S., Neduelil, J. G., Wang, X., Wallace, B. A. & Sansom, M. S. HOLE: a program for the analysis of the pore dimensions of ion channel structural models. *J Mol Graph* **14**, 354-360, 376, doi:10.1016/s0263-7855(97)00009-x (1996).
- 2 Sun, J. & MacKinnon, R. Cryo-EM Structure of a KCNQ1/CaM Complex Reveals Insights into Congenital Long QT Syndrome. *Cell* **169**, 1042-1050 e1049, doi:10.1016/j.cell.2017.05.019 (2017).
- 3 Sun, J. & MacKinnon, R. Structural Basis of Human KCNQ1 Modulation and Gating. *Cell* **180**, 340-347 e349, doi:10.1016/j.cell.2019.12.003 (2020).
- 4 Eldstrom, J., McAfee, D. A., Dou, Y., Wang, Y. & Fedida, D. ML277 regulates KCNQ1 single-channel amplitudes and kinetics, modified by voltage sensor state. *J Gen Physiol* **153**, doi:10.1085/jgp.202112969 (2021).
