# Supplementary material for: Structural and electrophysiological basis for the modulation of KCNQ1 channel currents by ML277
Source: PubMed Central journal article supplement (PMC9243137; doi:10.1038/s41467-022-31526-7), 2022-06-29
Supplement: 41467_2022_31526_MOESM3_ESM.pdf [file 41467_2022_31526_MOESM3_ESM.pdf]

**File name: Supplementary Movie 1**

**Description: Animation of the twist of the coiled coil C-terminal domain induced by the binding of ML277 to xKCNQ1-CaM.** KCNQ1 is shown in gray, one protomer is highlighted in blue, CaM has been removed for clarity and ML277 is shown in orange surface. The binding of ML277 on xKCNQ1- CaM leads to a twist of the coiled coil C-terminal domain (Fig. 3). The animation was prepared with Chimera using the Morph Conformations tool.
